# Supplementary material for: Cardioprotective Effect of a Virgin Olive Oil Enriched with Bioactive Compounds in Spontaneously Hypertensive Rats
Source: MDPI journal article supplement (doi:10.3390/nu11081728), 2019-07-26
Supplement: s1 [file s1]

**Supplemental Table S1.** Characteristics of the olive oils used in the study.

|                                                              | CO          | FOO          |
|--------------------------------------------------------------|-------------|--------------|
| Acidity (%)                                                  | 0.14        | 0.14         |
| Peroxide value (meq/Kg)                                      | 5.3         | 9.5          |
| K270                                                         | 0.14        | 0.15         |
| K232                                                         | 1.79        | 1.85         |
| DeltaK                                                       | <0.01       | <0.01        |
| <b>Fatty acids</b>                                           |             |              |
| Miristic acid (C14) (%)                                      | 0.01        | 0.01         |
| Palmitic acid (C16) (%)                                      | 10.12       | 10.09        |
| Palmitoleic acid (C16:1) (%)                                 | 0.93        | 0.92         |
| Margaric acid (C17) (%)                                      | <0.10       | <0.10        |
| Margaroleic acid (C17:1) (%)                                 | 0.16        | 0.15         |
| Stearic acid (C18) (%)                                       | 3.81        | 3.79         |
| Oleic acid (C18:1) (%)                                       | 79.71       | 79.87        |
| Linoleic acid (C18:2n6) (%)                                  | 3.95        | 3.91         |
| Linolenic acid (C18:3n3) (%)                                 | 0.67        | 0.65         |
| Araquidic acid (C20) (%)                                     | 0.33        | 0.32         |
| Gadoleic acid (C20:1) (%)                                    | 0.19        | 0.18         |
| Behenic acid (C22) (%)                                       | 0.11        | 0.11         |
| Lignoceric acid (C24) (%)                                    | <0.10       | <0.10        |
| <b>Total ethyl esters (mg/Kg)</b>                            | <b>6</b>    | <b>13</b>    |
| Ethyl palmitate (mg/Kg)                                      | 3           | 6            |
| Ethyl oleate (mg/Kg)                                         | 4           | 7            |
| <b>Total sterols (mg/Kg)</b>                                 | <b>1316</b> | <b>1328</b>  |
| Cholesterol (% of total sterols)                             | 0.1         | 0.1          |
| Brassterol (% of total sterols)                              | <0.1        | <0.1         |
| Campesterol (% of total sterols)                             | 3.2         | 3.3          |
| Stigmasterol (% of total sterols)                            | 0.5         | 0.5          |
| B-Sitosterol (% of total sterols)                            | 94.9        | 94.8         |
| D7-Stigmastenol (% of total sterols)                         | 0.4         | 0.4          |
| <b>Total phenolic compounds (mg/Kg)</b>                      | <b>17.6</b> | <b>749.9</b> |
| <i>Organic and phenolic acids and aldehydes (mg/kg)</i>      | <i>n.d.</i> | 235.2        |
| Quinic acid* (mg/kg)                                         | n.d.        | 92.3         |
| 3,4-dihydroxyphenylglycol* (mg/kg)                           | n.d.        | 116.6        |
| Chlorogenic acid (mg/kg)                                     | n.d.        | 22.2         |
| p-coumaric acid* (mg/kg)                                     | n.d.        | 3.0          |
| Vanillin* (mg/kg)                                            | n.d.        | 0.32         |
| Ferulic acid* (mg/kg)                                        | n.d.        | 0.80         |
| <i>Simple phenols (mg/kg)</i>                                | 0.15        | 179.0        |
| Hydroxytyrosol* (mg/kg)                                      | n.d.        | 110.0        |
| Tyrosol* (mg/kg)                                             | 0.15        | 69.0         |
| <i>Glycosylated secoiridoids and derivatives (mg/kg)</i>     | <i>n.d.</i> | 204.8        |
| Acycloclihydroelenolic acid hexoside (mg/kg)                 | n.d.        | 21.0         |
| Oleoside/secologanoside (mg/kg)                              | n.d.        | 103.2        |
| Elenolic acid glucoside (mg/kg)                              | n.d.        | 31.9         |
| Hydroxy oleuropein (mg/kg)                                   | n.d.        | 32.3         |
| Oleuropein* (mg/kg)                                          | n.d.        | 16.4         |
| <i>Secoiridoids and derivatives in aglycone form (mg/kg)</i> | 17.0        | 82.9         |
| Elenolic acid (mg/kg)                                        | 0.01        | 2.6          |

|                                                    |      |      |
|----------------------------------------------------|------|------|
| Hydroxydecarboxymethyl oleuropein aglycone (mg/kg) | n.d. | 4.7  |
| Decarboxymethyl oleuropein aglycone (mg/kg)        | 1.3  | 8.2  |
| 10-Hydroxy-oleuropein aglycone (mg/kg)             | 0.11 | 0.3  |
| Decarboxymethyl ligstroside aglycone (mg/kg)       | 2.4  | 6.3  |
| Ligstroside algycone (mg/kg)                       | 6.1  | 2.2  |
| Oleuropein algycone (mg/kg)                        | 7.1  | 58.5 |
| <i>Flavonoids</i> (mg/kg)                          | 0.1  | 40.9 |
| Luteolin-7-O-glucoside* (mg/kg)                    | n.d. | 4.6  |
| Luteolin-O-glucoside isomers (mg/kg)               | n.d. | 12.3 |
| Apigenin-7-O-glucoside* (mg/kg)                    | n.d. | 1.7  |
| Apigenin-O-glucoside isomers (mg/kg)               | n.d. | 3.6  |
| Luteolin* (mg/kg)                                  | 0.03 | 14.5 |
| Apigenin* (mg/kg)                                  | 0.04 | 1.6  |
| Diosmetin (mg/kg)                                  | 0.03 | 2.5  |
| <i>Lignans</i> (mg/kg)                             | 0.31 | 7.1  |
| Syringaresinol (mg/kg)                             | 0.10 | 1.8  |
| Pinoresinol* (mg/kg)                               | 0.11 | 2.5  |
| Acetoxypinoresinol (mg/kg)                         | 0.10 | 2.8  |

---

Individual phenolic compounds quantitative data obtained for the oils evaluated in this study by the LC-MS method described in Appendix A. Every result (expressed in mg/kg of olive oil) is the mean value of three independent replicates. Individual sterols are expressed as the percentage of total sterols. RSD values were lower than 8.4 % in every case. \*Phenolic compounds quantified in terms of their pure standard. CO, control oil FOO, functional oil; n.d.: non detected.

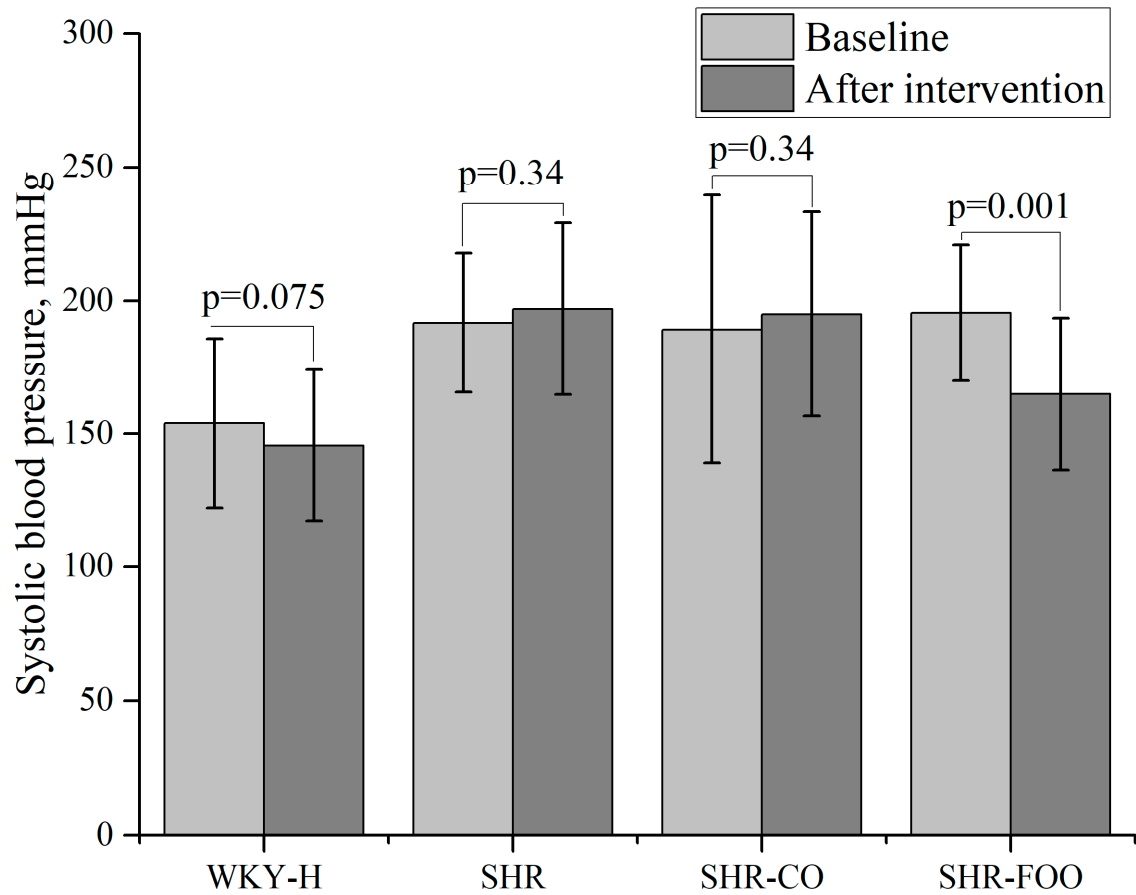

**Supplemental Figure S1:** Systolic blood pressure at the beginning and end of the intervention. The data are means  $\pm$  SEM. ANOVA test were used to compare results between groups for normal distribution variable, for multiple comparisons among groups Bonferroni *post hoc* test was used.  $P < 0.05$  was considered significant. SHR, spontaneously hypertensive rats. SHR-CO, spontaneously hypertensive rats supplemented with the control olive oil. SHR-FOO, spontaneously hypertensive rats supplemented with the functional olive oil. WKY-H, Wistar Kyoto healthy rats.
